# Supplementary material for: The relationship of early expressed milk quantity and later full breastmilk feeding after very preterm birth: A cohort study
Source: PubMed Central journal article supplement (PMC11650023; doi:10.1111/mcn.13719), 2024-09-06
Supplement: MCN-21-e13719-s001.pdf [file MCN-21-e13719-s001.pdf]

## Supplementary Material

**Supplementary Figure 1: Participant data flow through the study**

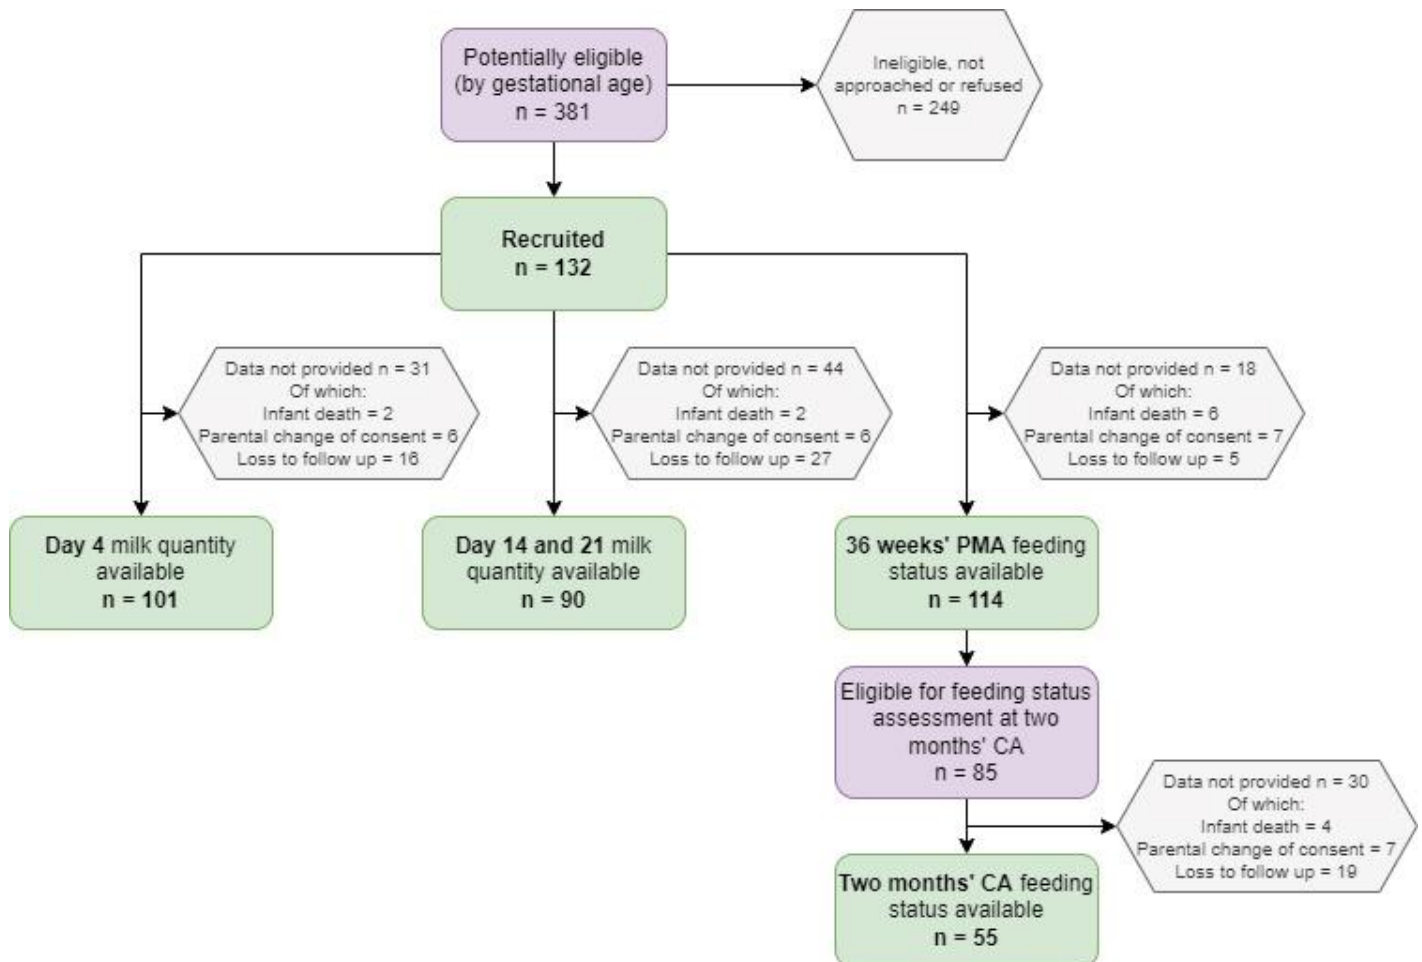

*PMA = post-menstrual age. CA = corrected age*

**Supplementary Figure 2: Breastmilk feeding rate over time, in participants eligible for complete follow up only**

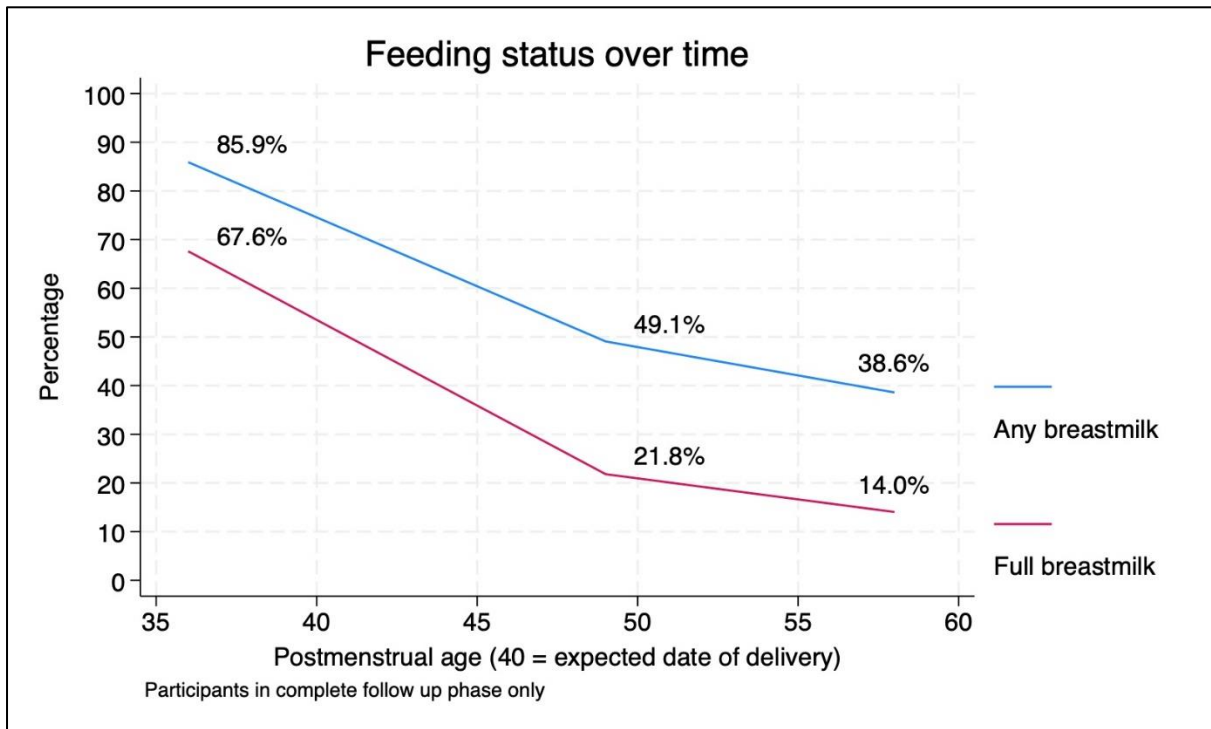

**Supplementary Figure 3: Receiver Operating Characteristic (ROC) analysis using expressed milk yield at day 4, day 14 and day 21 with an outcome of full MOM at 36 weeks' PMA**

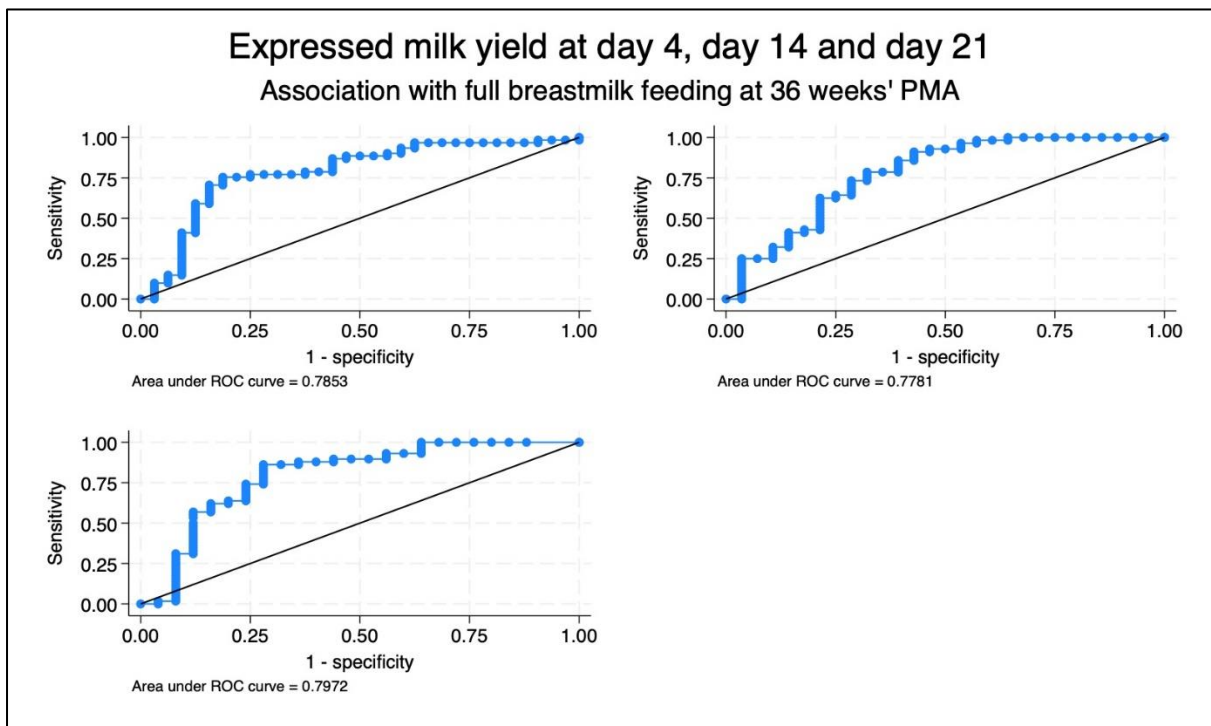

Supplementary Figure 4: Infographic for parents (day 4)

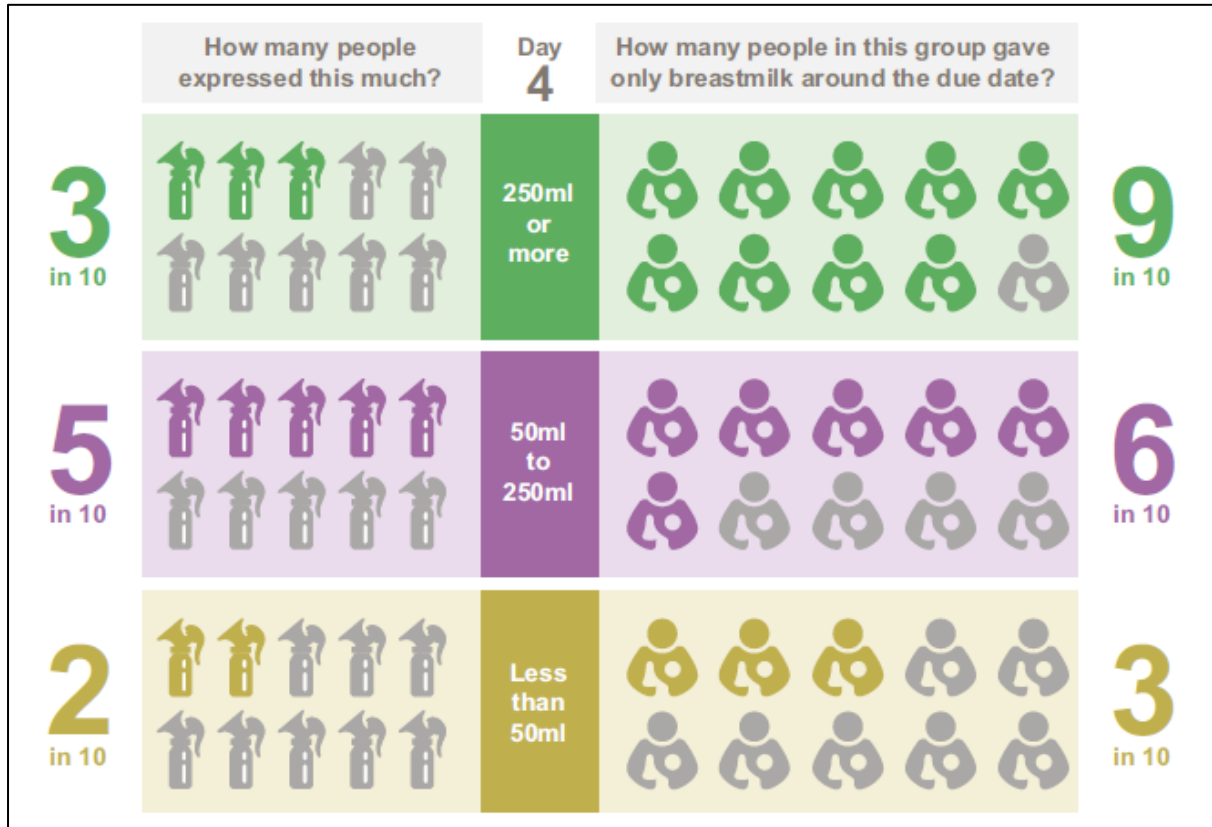

Supplementary Figure 5: Infographic for parents (day 21)

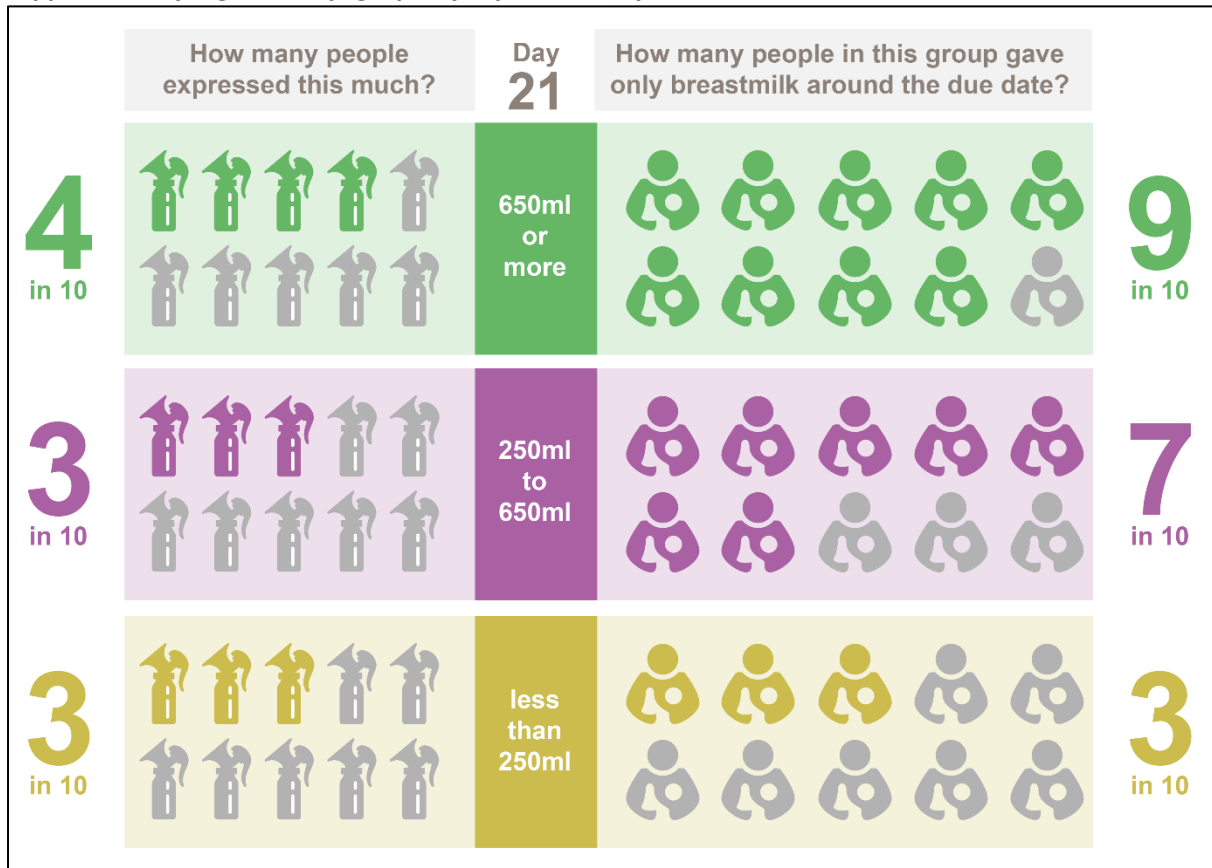

**Supplementary Figure 6: Milk yield according to participant perception of milk supply, day 4 and 21**

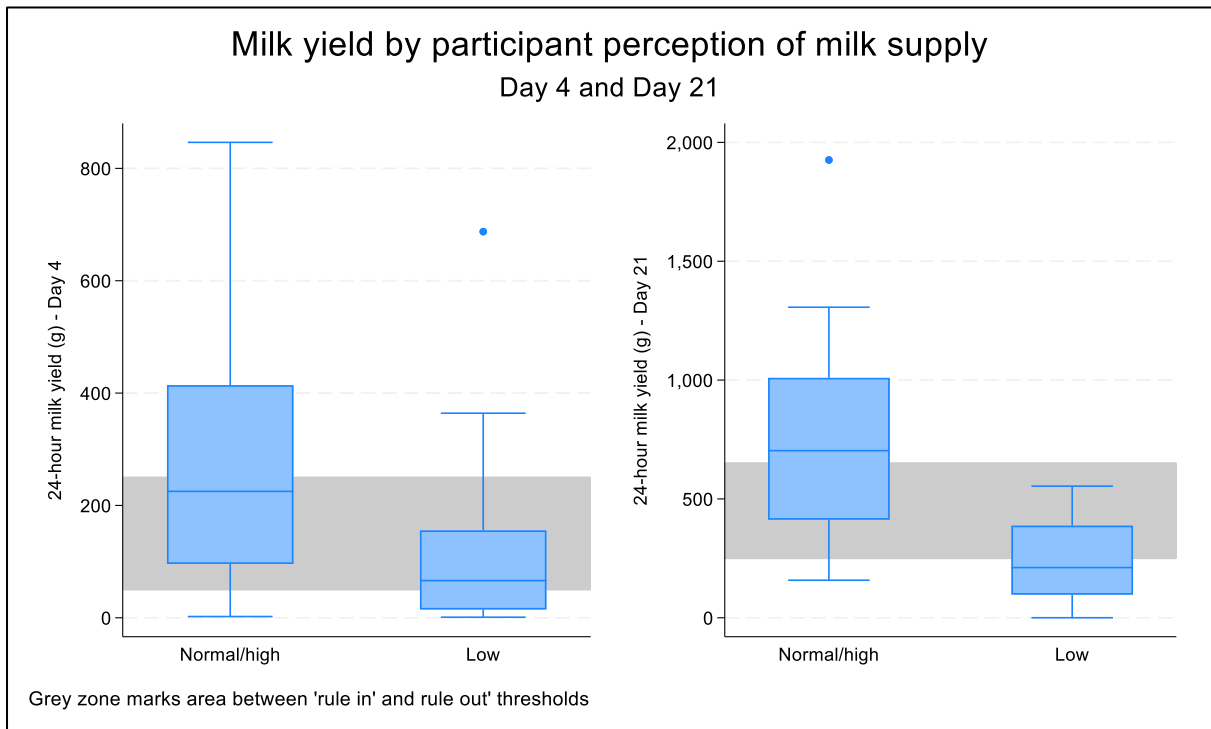

**Supplementary Table 1: Comparing potential 'rule in' milk yield thresholds at day 4 and day 21.**

|               | Sensitivity                    | Specificity                    | PPV                            | LR+        | Sensitivity                     | Specificity                    | PPV                           | LR+        |
|---------------|--------------------------------|--------------------------------|--------------------------------|------------|---------------------------------|--------------------------------|-------------------------------|------------|
|               | Exclusive MOM at 36 weeks' PMA |                                |                                |            | Exclusive MOM at two-months' CA |                                |                               |            |
| <b>Day 4</b>  |                                |                                |                                |            |                                 |                                |                               |            |
| 250g          | 29/61<br>(47.5%)               | <b>28/32</b><br><b>(87.5%)</b> | 29/33<br>(87.9%)               | 3.8        | 6/10 (60%)                      | <b>36/44</b><br><b>(81.8%)</b> | <b>6/14</b><br><b>(42.9%)</b> | <b>3.3</b> |
| 200g          | 38/61<br>(62.3%)               | 27/32<br>(84.4%)               | <b>38/43</b><br><b>(88.4%)</b> | <b>4.0</b> | 7/10 (70%)                      | 29/44<br>(65.9%)               | 7/22<br>(31.8%)               | 2.1        |
| 150g          | 45/61<br>(73.8%)               | 26/32<br>(81.3%)               | 45/51<br>(88.2%)               | 3.9        | 8/10 (80%)                      | 25/44<br>(56.8%)               | 8/27<br>(29.6%)               | 1.9        |
| <b>Day 21</b> |                                |                                |                                |            |                                 |                                |                               |            |
| 750g          | 24/58<br>(41.4%)               | <b>22/25</b><br><b>(88.0%)</b> | 24/27<br>(88.9%)               | 3.5        | 7/11<br>(63.6%)                 | <b>29/35</b><br><b>(82.9%)</b> | <b>7/13</b><br><b>(53.9%)</b> | 3.7        |
| 650g          | 32/58<br>(55.2%)               | <b>22/25</b><br><b>(88.0%)</b> | 32/35<br>(91.4%)               | 4.6        | 8/11<br>(72.7%)                 | <b>27/35</b><br><b>(82.9%)</b> | 8/16<br>(50.0%)               | <b>4.2</b> |
| 600g          | 33/58<br>(56.9%)               | <b>22/25</b><br><b>(88.0%)</b> | <b>33/36</b><br><b>(91.7%)</b> | <b>4.7</b> | 8/11<br>(72.7%)                 | 27/35<br>(77.1%)               | 8/16<br>(50.0%)               | 3.2        |
| 550g          | 36/58<br>(62.1%)               | 20/25<br>(80.0%)               | 36/41<br>(87.8%)               | 3.0        | 9/11<br>(81.8%)                 | 24/35<br>(68.6%)               | 9/20<br>(45.0%)               | 2.6        |
| 500g          | 37/58<br>(63.8%)               | 19/25<br>(76.0%)               | 37/43<br>(86.1%)               | 2.7        | 9/11<br>(81.8%)                 | 24/35<br>(68.6%)               | 9/20<br>(45.0%)               | 2.6        |

Best performing yields are marked in bold. Proposed chosen thresholds are shown in grey. PPV = positive predictive value. LR+ = likelihood ratio of the outcome when the threshold is exceeded

**Supplementary Table 2: Comparing potential 'rule out' thresholds at day 4 and day 21.**

|                    | Specificity                    | Sensitivity                    | NPV                            | LR-         | Specificity                     | Sensitivity                 | NPV                            | LR-         |
|--------------------|--------------------------------|--------------------------------|--------------------------------|-------------|---------------------------------|-----------------------------|--------------------------------|-------------|
|                    | Exclusive MOM at 36 weeks' PMA |                                |                                |             | Exclusive MOM at two-months' CA |                             |                                |             |
| <b>Day 4</b>       |                                |                                |                                |             |                                 |                             |                                |             |
| 150g               | 26/32<br>(81.3%)               | 45/61<br>(73.8%)               | 26/42<br>(61.9%)               | 0.32        | 25/44<br>(56.8%)                | 8/10<br>(80%)               | 25/27<br>(92.6%)               | 0.35        |
| 50g                | 13/32<br>(40.6%)               | <b>56/61</b><br><b>(91.8%)</b> | <b>13/18</b><br><b>(72.2%)</b> | <b>0.20</b> | 13/44<br>(29.6%)                | <b>9/10</b><br><b>(90%)</b> | 13/14<br>(92.9%)               | 0.34        |
| No lactogenesis II | 19/32<br>(59.4%)               | 53/61<br>(86.9%)               | 19/27<br>(70.4%)               | 0.22        | 19/44<br>(43.2%)                | <b>9/10</b><br><b>(90%)</b> | <b>19/20</b><br><b>(95%)</b>   | <b>0.23</b> |
| <b>Day 21</b>      |                                |                                |                                |             |                                 |                             |                                |             |
| 250g               | 14/25<br>(56%)                 | 52/58<br>(89.7%)               | <b>14/20</b><br><b>(70%)</b>   | <b>0.18</b> | 36/44<br>(81.8%)                | 6/10 (60%)                  | 36/40<br>(90%)                 | <b>0.31</b> |
| 200g               | 9/25 (36%)                     | <b>54/58</b><br><b>(93.1%)</b> | 9/13<br>(69.2%)                | 0.19        | 29/44<br>(65.9%)                | <b>7/10 (70%)</b>           | <b>29/32</b><br><b>(90.6%)</b> | 0.46        |

Best performing yields are marked in bold. Proposed chosen thresholds are shown in grey. NPV = negative predictive value. LR- = likelihood ratio of the outcome when yield is below the threshold
